# Supplementary material for: COVID-19 Clinical Profiles and Fatality Rates in Hospitalized Patients Reveal Case Aggravation and Selective Co-Infection by Limited Gram-Negative Bacteria
Source: MDPI journal article supplement (doi:10.3390/ijerph19095270), 2022-04-26
Supplement: s1 [file s1]

Supplementary Material Table S1 . COVID-19 Clinical profiles, bacterial coinfection, and patient demographics and outcomes in Ha'il, KSA

| No | bacteria            | Specimen*    | age + | Intubated? | h O2    | LALC | Death |
|----|---------------------|--------------|-------|------------|---------|------|-------|
| 1  | <i>K.pneumoniae</i> | Bloody,sputu | 66    | yes        | vent    | 4.5  | Yes   |
| 2  | <i>K.pneumoniae</i> | Bood,urine   | 52    | yes        | vent    | 4.7  | Yes   |
| 3  | <i>K.pneumoniae</i> | Blood,urine  | 73    | yes        | vent    | 4.9  | Yes   |
| 4  | <i>K.pneumoniae</i> | Sputum       | 55    | yes        | vent    | 4.9  | Yes   |
| 5  | <i>K.pneumoniae</i> | Sputum       | 65    | yes        | vent    | 4.6  | Yes   |
| 6  | <i>K.pneumoniae</i> | Blood        | 68    | yes        | vent    | 5.5  | Yes   |
| 7  | <i>K.pneumoniae</i> | sputum       | 85    | yes        | vent    | 4.9  | Yes   |
| 8  | <i>K.pneumoniae</i> | Blood-a      | 38    | yes        | vent    | 4.7  |       |
| 9  | <i>K.pneumoniae</i> | Blood-an     |       | yes        | vent    | 4.9  |       |
| 10 | <i>K.pneumoniae</i> | Blood        | 48    | yes        | vent    | 4.5  | Yes   |
| 11 | <i>K.pneumoniae</i> | Blood        | 83    | yes        | vent    | 5.5  | Yes   |
| 12 | <i>K.pneumoniae</i> | Blood        | 81    | yes        | vent    | 5.1  | Yes   |
| 13 | <i>K.pneumoniae</i> | Catheter     | 61    | yes        | vent    | 4.7  | Yes   |
| 14 | <i>K.pneumoniae</i> | Sputum       | 69    | no         | 6liter  | 2.5  | No    |
| 15 | <i>K.pneumoniae</i> | Urine        | 69    | no         | 6 liter | 2.5  | No    |
| 16 | <i>K.pneumoniae</i> | Urine        | 44    | no         | 8liter  | 1.9  | No    |
| 17 | <i>K.pneumoniae</i> | Wound        | 20    | yes        | 2.3lite | 1.9  |       |
| 18 | <i>K.pneumoniae</i> | Blood        | 38    | no         | 4liter  | 2.5  | No    |
| 19 | <i>K.pneumoniae</i> | Sputum       | 68    | yes        | 4liter  | 2.1  | No    |
| 20 | <i>K.pneumoniae</i> | Sputum       | 29    | no         | 6 liter | 2.1  | No    |
| 21 | <i>K.pneumoniae</i> | Wound        | 46    | no         | 6liter  | 2.1  | No    |
| 22 | <i>K.pneumoniae</i> | Blood        | 43    | no         | 4liter  | 2.4  | No    |
| 23 | <i>K.pneumoniae</i> | Blood        | 70    | yes        | vent    | 5.8  | Yes   |
| 24 | <i>K.pneumoniae</i> | Pleural F    | 69    | no         | vent    | 4.3  | No    |
| 25 | <i>K.pneumoniae</i> | Sputum       | 51    | no         | yes     | 3.1  | No    |
| 26 | <i>K.pneumoniae</i> | Wound        | 55    | no         | yes     | 4.6  | No    |
| 27 | <i>K.pneumoniae</i> | Sputum       | 36    | no         | 6liter  | 2.2  | No    |
| 28 | <i>K.pneumoniae</i> | Urine        | 59    | no         |         |      | No    |

|    |                      |              |    |     |         |     |     |
|----|----------------------|--------------|----|-----|---------|-----|-----|
| 29 | <i>K.pneumoniae</i>  | Urine        | 53 | yes |         | 4.6 |     |
| 30 | <i>K.pneumoniae</i>  | Wound        | 20 | no  | 6liter  | 2.1 | No  |
| 31 | <i>K.pneumoniae</i>  | Wound        | 20 | no  | vent    | NA  | No  |
| 32 | <i>K.pneumoniae</i>  | Blood        | 47 | no  | NA      | NA  | NA  |
| 33 | <i>K.pneumoniae</i>  | Sputum       | 47 | no  | NA      | NA  | NA  |
| 34 | <i>K.pneumoniae</i>  | Sputum       | 36 | yes | 6liter  | 2.1 | NA  |
| 35 | <i>K.pneumoniae</i>  | Blood        | 45 | no  | 6liter  | 2.1 | No  |
| 36 | <i>K.pneumoniae</i>  | Wound        | 66 | no  | 8liter  | 3.3 | No  |
| 37 | <i>K.pneumoniae</i>  | Urine        | 70 | yes | vent    | 3.5 | Yes |
| 38 | <i>K.pneumoniae</i>  | Urine        | 64 | yes | NA      | NA  | No  |
| 39 | <i>K.pneumoniae</i>  | Sputum       | 64 | yes | vent    | NA  | NA  |
| 40 | <i>K.pneumoniae</i>  | Wound        | 64 | yes | NA      | NA  | NA  |
| 41 | <i>K.pneumoniae</i>  | Urine        | 41 | yes | NA      | NA  | NA  |
| 42 | <i>K.pneumoniae</i>  | Urine        | 56 | no  | yes     | 3.9 | No  |
| 43 | <i>K.pneumoniae</i>  | Urine        | 67 | yes | yes     | 4.6 | No  |
| 44 | <i>K.pneumoniae</i>  | Blood        | 71 | no  | yes     | 4.1 | No  |
| 45 | <i>K.pneumoniae</i>  | Urine        | 85 | yes | vent    | 3.6 | Yes |
| 46 | <i>K.pneumoniae</i>  | Screen       | 67 | no  | yes     | 4.5 | No  |
| 47 | <i>K.pneumoniae</i>  | Urine        | 52 | no  | 8iters  | 2.7 | No  |
| 48 | <i>K. pneumoniae</i> | Wound        | 75 | no  | 8iters  | 2.1 | No  |
| 49 | <i>A.baumannii</i>   | Wound        | 39 | no  | 6 liter | 1.6 | No  |
| 50 | <i>A.baumannii</i>   | Blood        | 79 | yes | vent    | 5.1 | Yes |
| 51 | <i>A.baumannii</i>   | Bloody sputm | 95 | yes | vent    | 6.2 | Yes |
| 52 | <i>A.baumannii</i>   | Blood        | 83 | yes | vent    | 6.2 | Yes |
| 53 | <i>A.baumannii</i>   | Blood        | 70 | yes | vent    | 5.5 | Yes |
| 54 | <i>A.baumannii</i>   | Wound        | 60 | no  | 8liter  | 2.7 | No  |
| 55 | <i>A.baumannii</i>   | Sputum       | 47 | no  | 4 liter | 2.5 | No  |
| 56 | <i>A.baumannii</i>   | Sputum       | 38 | yes | vent    | 5.9 | Yes |
| 57 | <i>A.baumannii</i>   | Blood        | 60 | yes | vent    | 4.1 | No  |
| 58 | <i>A.baumannii</i>   | Wound        | 33 | no  | 8liter  | 2.2 | No  |

|    |                     |           |    |     |         |     |     |
|----|---------------------|-----------|----|-----|---------|-----|-----|
| 59 | <i>A.baumannii</i>  | Sputum    | 69 | no  | 4 liter | 2.5 |     |
| 60 | <i>A.baumannii</i>  | Blood     | 69 | no  | 6 liter | 2.2 | No  |
| 61 | <i>A.baumannii</i>  | Blood     | 40 | no  | 8liter  | 2.9 | No  |
| 62 | <i>A.baumannii</i>  | Blood     | 59 | yes | vent    | 3.7 | Yes |
| 63 | <i>A.baumannii</i>  | Sputum    | 69 | no  | 4 liter | 2.5 | Yes |
| 64 | <i>A.baumannii</i>  | Blood     | 67 | no  | 4 liter | 2.5 | NA  |
| 65 | <i>A.baumannii</i>  | Blood     | 62 | yes | vent    | 5.5 | Yes |
| 66 | <i>A.baumannii</i>  | Sputum    | 62 | no  | 4 liter | 2.5 | NA  |
| 67 | <i>A.baumannii</i>  | Sputum    | 27 | no  | 6liter  | 3.1 | No  |
| 68 | <i>A.baumannii</i>  | Blood     | 73 | no  | yes     | 4.6 | No  |
| 69 | <i>A.baumannii</i>  | Sputum    | 84 | yes | vent    | 5.1 | Yes |
| 70 | <i>A.baumannii</i>  | Blood     | 47 | no  | 4 liter | 2.5 | Yes |
| 71 | <i>A. baumannii</i> | Sputum    | 65 | yes | vent    | 4.3 | Yes |
| 72 | <i>A.baumannii</i>  | Pleural F | 34 | no  | 6liter  | 1.9 | No  |
| 73 | <i>A.baumannii</i>  | Sputum    | 57 | no  | yes     | 4.4 | No  |
| 74 | <i>A. baumannii</i> | Blood     | 73 | no  | 4 liter | 2.5 | No  |
| 75 | <i>A. baumannii</i> | Sputum    | 84 | no  | 4 liter | 2.5 | NA  |
| 76 | <i>A. baumannii</i> | Blood     | 54 | no  | 8liter  | 3.3 | No  |
| 77 | <i>A. baumannii</i> | Blood     | 36 | no  | 4 liter | 2.5 |     |
| 78 | <i>A. baumannii</i> | Wound     | 57 | no  | yes     | 3.7 | No  |
| 79 | <i>A. baumannii</i> | Blood     | 51 | no  | yes     | 4.4 | No  |
| 80 | <i>A. baumannii</i> | Sputum    | 51 | no  | 4 liter | 2.5 |     |
| 81 | <i>A. baumannii</i> | Sputum    | 66 | no  | yes     | 3.7 | No  |
| 82 | <i>A. baumannii</i> | Sputum    | 55 | no  | 8liter  | 3.4 | No  |
| 83 | <i>E.coli</i>       | Blood     | 82 | no  | 4 liter | 2.5 |     |
| 84 | <i>E.coli</i>       | Urine     | 61 | yes | vent    | 5.3 | Yes |
| 85 | <i>E.coli</i>       | Sputum    | 63 | no  | 6liter  | 2.7 | No  |
| 86 | <i>E.coli</i>       | Urine     | 81 | yes | vent    | 4.9 | Yes |
| 87 | <i>E.coli</i>       | Urine     | 74 | no  | yes     | 4.7 | No  |
| 88 | <i>E.coli</i>       | Urine     | 76 | no  | yes     | 3.8 | No  |

|     |                     |        |    |     |         |     |     |
|-----|---------------------|--------|----|-----|---------|-----|-----|
| 89  | <i>E. coli</i>      | Screen | 58 | no  | yes     | 3.9 | No  |
| 90  | <i>E.coli</i>       | Wound  | 72 | no  | yes     | 4.4 | No  |
| 91  | <i>E.coli</i>       | Urine  | 57 |     |         |     | No  |
| 92  | <i>E.coli</i>       | Blood  | 41 | no  | 4liter  | 1.9 | No  |
| 93  | <i>E.coli</i>       | Urine  | 45 | no  | 8liter  | 2.7 | No  |
| 94  | <i>E.coli</i>       | Urine  | 72 | no  | yes     | 3.7 | No  |
| 95  | <i>E.coli</i>       | Urine  | 35 | no  | 6liter  | 2.2 | No  |
| 96  | <i>E.coli</i>       | Urine  | 34 | no  | 8liter  | 1.9 | No  |
| 97  | <i>E.coli</i>       | Urine  | 78 | no  | 6iters  | 2.7 | No  |
| 98  | <i>E.coli</i>       | Urine  | 62 | no  | yes     | 3.9 | No  |
| 99  | <i>E.coli</i>       | Blood  | 69 | no  | yes     | 3.8 | No  |
| 100 | <i>E.coli</i>       | Urine  | 49 | no  | 6liter  | 2.8 | No  |
| 101 | <i>E.coli</i>       | Urine  | 77 | no  | yes     | 3.8 | No  |
| 102 | <i>E.coli</i>       | Urine  | 10 |     |         | 3.8 |     |
| 103 | <i>E.coli</i>       | Wound  | 67 | no  | 4 liter | 1.2 | No  |
| 104 | <i>E.coli</i>       | Urine  | 89 | no  | 6 liter | 1.4 | No  |
| 105 | <i>E.coli</i>       | Wound  | 25 | no  | 8iters  | 2.4 | No  |
| 106 | <i>E.coli</i>       | Urine  | 83 | yes | vent    | 4.2 | Yes |
| 107 | <i>P.aeruginosa</i> | Sputum | 62 | no  | 6 liter | 2.2 | No  |
| 108 | <i>P.aeruginosa</i> | Wound  | 60 | no  | 8liter  | 1.9 | No  |
| 109 | <i>P.aeruginosa</i> | Sputum | 76 | no  | 8liter  | 2.4 | No  |
| 110 | <i>P.aeruginosa</i> | Wound  | 60 | yes | yes     | 4.3 | No  |
| 111 | <i>P.aeruginosa</i> | Sputum | 64 | no  | yes     | 3.7 | No  |
| 112 | <i>P.aeruginosa</i> | Wound  | 43 | no  | yes     | 4.3 | No  |
| 113 | <i>P.aeruginosa</i> | Wound  | 56 | no  | 4liter  | 2.5 | No  |
| 114 | <i>P.aeruginosa</i> | Wound  | 53 | no  |         |     | No  |
| 115 | <i>P.aeruginosa</i> | Sputum | 68 | no  | 8liter  | 2.5 | No  |
| 116 | <i>P.aeruginosa</i> | Sputum | 81 | yes | vent    | 5.1 | Yes |
| 117 | <i>P.aeruginosa</i> | Wound  | 37 | no  | 6liter  | 2.4 | No  |
| 118 | <i>Providentia</i>  | Wound  | 43 | no  | 6liter  | 2.3 | No  |

|     |                         |           |    |     |        |     |     |
|-----|-------------------------|-----------|----|-----|--------|-----|-----|
| 119 | <i>Enterobacter</i>     | Urine     | 52 | no  | vent   | 2.7 | No  |
| 120 | <i>Eneterobacter</i>    | Wound     | 66 | no  | yes    | 4.1 | No  |
| 121 | <i>Providencia</i>      | Wound     | 72 | no  | 8liter | 3.3 | No  |
| 122 | <i>Providencia</i>      | Wound     | 40 | no  | 6liter | 3.1 | No  |
| 123 | <i>Serratia</i>         | Sputum    | 58 |     |        |     | Yes |
| 124 | <i>Serratia</i>         | sputum    | 73 | yes | vent   | 3.1 | Yes |
| 125 | <i>morganella</i>       | Pleural F | 65 | yes | vent   | 4.4 | Yes |
| 126 | <i>morganella</i>       | Urine     | 79 | yes | vent   | 3.6 | Yes |
| 127 | <i>Stenotrophomonas</i> | Blood     | 45 | no  | 6liter | 3.3 | No  |
| 128 | <i>Achromobacte</i>     | Urine     | 56 | no  | 4liter | 2.2 | No  |
| 129 | <i>C. koseri</i>        | Urine     | 82 | yes | vent   | 6.1 | Yes |

\*Specimens were color coded for easy access. <sup>+</sup>Age range color: 1 to 20 = light green, 21 to 49 dark green, over 50 blue. CXR = chest x-ray. h-O<sub>2</sub> = highest oxygen requirement during admission. HTN =hypertension. LALC =Lowest absolute lymphocyte count. CKD = chronic kidney disease. HF = heart failure. IHD = ischemic heart disease
